# Supplementary material for: Protein signature in cerebrospinal fluid and serum of Alzheimer’s disease patients: The case of apolipoprotein A-1 proteoforms
Source: PubMed Central journal article supplement (PMC5476270; doi:10.1371/journal.pone.0179280), 2017-06-19
Supplement: pone.0179280.s004.pdf [file pone.0179280.s004.pdf]

| Sample | Age (years) | MMSE | DIAGNOSIS | AB<br>(pg/mL) | Tau<br>(pg/mL) | p-Tau<br>(pg/mL) |
|--------|-------------|------|-----------|---------------|----------------|------------------|
| 1      | 86          | 17   |           | 1014          | 191            | 56               |
| 2      | 70          | 25   |           | 307           | 609            | 124              |
| 3      | 83          | 25   |           | 372           | 1420           | 132              |
| 4      | 76          | 24   |           | 391           | 999            | 136              |
| 5      | 71          | 27   |           | 493           | 1316           | 87               |
| 6      | 86          | 13   |           | 393           | 1266           | 70               |
| 7      | 70          | 26   |           | 346           | 575            | 70               |
| 8      | 68          | 26   |           | 268           | 779            | 110              |
| 9      | 76          | 27   |           | 1151          | 162            | 18               |
| 10     | 76          | 21   |           | 462           | 745            | 64               |
| 11     | 73          | 23   |           | 454           | 206            | 22               |
| 12     | 75          | 16   |           | 544           | 803            | 100              |
| 13     | 81          | 22   |           | 563           | 826            | 109              |
| 14     | 70          | 26   |           | 260           | 421            | 50               |
| 15     | 78          | 21,3 |           | 226           | 423            | 80               |
| 16     | 75          | 16   |           | 590           | 721            | 65               |
| 17     | 81          | 24   |           | 414           | 419            | 68               |
| 18     | 80          | 19   | AD        | 322           | 208            | 28               |
| 19     | 82          | 26   |           | 354           | 567            | 81               |
| 20     | 71          | 18   |           | 748           | 578            | 59               |
| 21     | 81          | 25   |           | 499           | 153            | 45               |
| 22     | 78          | 25   |           | 516           | 110            | 33               |
| 23     | 79          | 22   |           | 532           | 276            | 73               |
| 24     | 75          | 27   |           | 546           | 491            | 101              |
| 25     | 75          | 21   |           | 492           | 163            | 41               |
| 26     | 80          | 24   |           | 654           | 646            | 78               |
| 27     | 79          | 23   |           | 504           | 572            | 52               |
| 28     | 82          | 22   |           | 447           | 146            | 77               |
| 29     | 82          | 25   |           | 509           | 512            | 75               |
| 30     | 68          | 13   |           | 472           | 308            | 68               |
| 31     | 73          | 18   |           | 275           | 2952           | 475              |
| 32     | 80          | 24   |           | 420           | 526            | 66               |
| 33     | 70          | 26   |           | 449           | 1524           | 155              |
| 34     | 78          | 25   |           | 288           | 1023           | 66               |
| 35     | 74          | 28   |           | 627           | 2126           | 155              |
| 36     | 78          | 29   |           | 624           | 842            | 171              |
| 37     | 90          | 23   |           | 453           | 909            | 102              |
| 38     | 87          | 20   |           | 456           | 934            | 128              |
| 39     | 84          | 17   |           | 563           | 826            | 109              |
| 40     | 85          | 13   |           | 260           | 421            | 50               |
| 41     | 84          | 24   |           | 861           | 501            | 19               |
| 42     | 77          | 24   |           | 859           | 284            | 42               |
| 43     | 85          | 18   |           | 997           | 496            | 37               |
| 44     | 81          | 24   |           | 900           | 256            | 45               |
| 45     | 83          | 29   |           | 1248          | 125            | 26               |
| 46     | 90          | 22   |           | 371           | 600            | 59               |
| 47     | 75          | 23   |           | 800           | 100            | 20               |
| 48     | 88          | 24   |           | 790           | 157            | 28               |

|      |    |    |      |      |     |    |
|------|----|----|------|------|-----|----|
| 49   | 91 | 30 |      | 586  | 133 | 15 |
| 50   | 86 | 26 |      | 225  | 422 | 80 |
| 51   | 84 | 24 |      | 590  | 721 | 65 |
| 52   | 82 | 27 |      | 450  | 682 | 58 |
| 53   | 83 | 28 | iNPH | 1158 | 99  | 15 |
| 54   | 87 | 21 |      | 661  | 676 | 73 |
| 55   | 85 | 29 |      | 610  | 75  | 15 |
| 56   | 70 | 23 |      | 1010 | 130 | 15 |
| 57   | 90 | 25 |      | 808  | 98  | 17 |
| 58   | 75 | 25 |      | 250  | 252 | 52 |
| 59   | 83 | 27 |      | 1120 | 159 | 29 |
| 60   | 73 | 23 |      | 526  | 46  | 24 |
| 61   | 79 | 22 |      | 1061 | 74  | 24 |
| 62   | 84 | 24 |      | 946  | 76  | 29 |
| 63   | 86 | 24 |      | 1570 | 146 | 51 |
| 64   | 81 | 28 |      | 819  | 115 | 35 |
| 65   | 85 | 29 |      | 614  | 67  | 25 |
| 66   | 86 | 15 |      | 747  | 102 | 29 |
| 67   | 80 | 27 |      | 418  | 250 | 26 |
| 68   | 83 | 23 |      | 226  | 423 | 79 |
| LC1  | 77 | -  |      | 453  | 49  | 10 |
| LC2  | 73 | -  |      | 581  | 54  | 7  |
| LC3  | 78 | -  |      | 457  | 111 | 13 |
| LC4  | 77 | -  |      | 853  | 85  | 14 |
| LC5  | 80 | -  |      | 965  | 96  | 25 |
| LC6  | 84 | -  | CT   | 1515 | 115 | 30 |
| LC7  | 74 | -  |      | 1306 | 103 | 26 |
| LC8  | 70 | -  |      | 1001 | 158 | 40 |
| LC10 | 68 | -  |      | 1424 | 95  | 31 |
| LC11 | 82 | -  |      | 1300 | 149 | 37 |
| LC12 | 55 | -  |      | 882  | 75  | 29 |
| LC13 | 69 | -  |      | 1062 | 94  | 35 |

**S1 Table. Detailed participants' characteristics.**
