# Supplementary material for: Protein signature in cerebrospinal fluid and serum of Alzheimer’s disease patients: The case of apolipoprotein A-1 proteoforms
Source: PubMed Central journal article supplement (PMC5476270; doi:10.1371/journal.pone.0179280), 2017-06-19
Supplement: pone.0179280.s006.pdf [file pone.0179280.s006.pdf]

| Protein name       | MW [kDa]  | pI  | Searched/<br>Matched<br>peptides | Mascot<br>score              | Sequence<br>coverage | m/z<br>measured | Mr<br>calculated | z | $\Delta$ m/z<br>[ppm] | Sequence                   |
|--------------------|-----------|-----|----------------------------------|------------------------------|----------------------|-----------------|------------------|---|-----------------------|----------------------------|
| Apolipoprotein A-1 | 30.8      | 5.5 | 11/28                            | 121                          | 34.5                 | 1012.5530       | 1011.5713        | 1 | -25.29                | <b>231AKPALEDLR239</b>     |
|                    |           |     |                                  |                              |                      | 1157.6099       | 1156.6200        | 1 | -15.00                | <b>202LEALKENGGAR212</b>   |
|                    |           |     |                                  |                              |                      | 1252.5954       | 1251.6136        | 1 | -20.33                | <b>121VQPYLDDFQK130</b>    |
|                    |           |     |                                  |                              |                      | 1283.5491       | 1282.5652        | 1 | -18.19                | <b>132WQEEMELYR140</b>     |
|                    |           |     |                                  |                              |                      | 1301.6250       | 1300.6412        | 1 | -18.03                | <b>185THLAPYSDEL R195</b>  |
|                    |           |     |                                  |                              |                      | 1318.6207       | 1317.6347        | 1 | -16.11                | <b>165LSPLGEE MRDR175</b>  |
|                    |           |     |                                  |                              |                      | 1380.6914       | 1379.7085        | 1 | -17.70                | <b>121VQPYLDDFQKK131</b>   |
|                    |           |     |                                  |                              |                      | 1400.6567       | 1399.6620        | 1 | -8.97                 | <b>52DYVSQFEGSALGK64</b>   |
|                    |           |     |                                  |                              |                      | 1411.6502       | 1410.6602        | 1 | -12.24                | <b>131KWQEEMELYR140</b>    |
|                    |           |     |                                  |                              |                      | 1467.7740       | 1466.7841        | 1 | -11.83                | <b>143VEPLRAELQEGAR155</b> |
| 1815.8479          | 1814.8435 | 1   | -1.58                            | <b>48DSGRDYVSQFEGSALGK64</b> |                      |                 |                  |   |                       |                            |

**S3 Table. Apo A-1 identification data.** Apo A-1 identification results provided by PMF approach.
