# Supplementary material for: Protein signature in cerebrospinal fluid and serum of Alzheimer’s disease patients: The case of apolipoprotein A-1 proteoforms
Source: PubMed Central journal article supplement (PMC5476270; doi:10.1371/journal.pone.0179280), 2017-06-19
Supplement: pone.0179280.s008.pdf [file pone.0179280.s008.pdf]

**S5 Table. 2-D DIGE volumes for Apo A-1 proteoforms in CSF.** Values represent the "standardised spot abundances" calculated by DeCyder software.

| Proteoform | Technical replicate | AD        |           |           |           |           | iNPH      |           |           |           |           | CT        |           |           |
|------------|---------------------|-----------|-----------|-----------|-----------|-----------|-----------|-----------|-----------|-----------|-----------|-----------|-----------|-----------|
|            |                     | subpool 1 | subpool 2 | subpool 3 | subpool 4 | subpool 5 | subpool 1 | subpool 2 | subpool 3 | subpool 4 | subpool 5 | subpool 1 | subpool 2 | subpool 3 |
| a          | 1                   | 0,812300  | 0,951192  | 0,908985  | 0,944458  | 0,901331  | 1,222856  | 1,218046  | 1,252496  | 1,220299  | 1,258486  | 3,371422  | 3,405803  | 2,910112  |
|            | 2                   | 0,932300  | 0,940897  | 0,908798  | 0,914051  | 0,892496  | 1,252159  | 1,199865  | 1,247482  | 1,210269  | 1,247221  | 3,363633  | 3,392919  | 2,900180  |
|            | 3                   | 0,870500  | 0,957292  | 0,915199  | 0,919917  | 0,889592  | 1,240479  | 1,209839  | 1,245693  | 1,203173  | 1,252856  | 3,353426  | 3,399811  | 2,896226  |
| b          | 1                   | 0,881616  | 0,819112  | 0,849019  | 0,847519  | 0,869187  | 1,289186  | 1,374682  | 1,257546  | 1,362826  | 1,230525  | 1,161453  | 1,290413  | 1,230048  |
|            | 2                   | 0,890989  | 0,835187  | 0,837997  | 0,822579  | 0,867542  | 1,278859  | 1,356844  | 1,264063  | 1,365222  | 1,244740  | 1,174544  | 1,287498  | 1,218045  |
|            | 3                   | 0,899647  | 0,830744  | 0,834721  | 0,832415  | 0,881856  | 1,279856  | 1,361101  | 1,259218  | 1,373460  | 1,238522  | 1,167281  | 1,279932  | 1,212059  |
| c          | 1                   | 0,799548  | 0,850127  | 0,830275  | 0,830278  | 0,841294  | 1,199858  | 1,240611  | 1,216534  | 1,244135  | 1,201456  | 0,366411  | 0,411256  | 0,346791  |
|            | 2                   | 0,810997  | 0,842094  | 0,819894  | 0,806496  | 0,831286  | 1,215049  | 1,232503  | 1,206246  | 1,241019  | 1,193746  | 0,379414  | 0,417024  | 0,351127  |
|            | 3                   | 0,812521  | 0,852214  | 0,823528  | 0,809697  | 0,842885  | 1,209596  | 1,224215  | 1,208476  | 1,233218  | 1,188445  | 0,374795  | 0,420114  | 0,358956  |
| d          | 1                   | 0,935647  | 0,871243  | 0,832475  | 0,880054  | 0,882146  | 1,129213  | 1,160429  | 1,181268  | 1,114452  | 1,179846  | 1,721596  | 1,703446  | 1,687440  |
|            | 2                   | 0,929985  | 0,861224  | 0,821812  | 0,872037  | 0,873144  | 1,119945  | 1,154622  | 1,189486  | 1,120046  | 1,191293  | 1,696912  | 1,691426  | 1,678435  |
|            | 3                   | 0,941054  | 0,875225  | 0,827294  | 0,878941  | 0,877649  | 1,123671  | 1,174116  | 1,192042  | 1,126173  | 1,185580  | 1,701883  | 1,695248  | 1,674126  |

average volume proteoform a  
 average volume proteoform b  
 average volume proteoform c  
 average volume proteoform d

|          |          |          |          |          |          |          |          |          |          |          |          |          |
|----------|----------|----------|----------|----------|----------|----------|----------|----------|----------|----------|----------|----------|
| 0,871700 | 0,949794 | 0,910994 | 0,926142 | 0,894473 | 1,238498 | 1,209250 | 1,248557 | 1,211247 | 1,252854 | 3,362827 | 3,399511 | 2,902173 |
| 0,890751 | 0,828348 | 0,840579 | 0,834171 | 0,872862 | 1,282634 | 1,364209 | 1,260276 | 1,367169 | 1,237929 | 1,167759 | 1,285948 | 1,220051 |
| 0,807689 | 0,848145 | 0,824566 | 0,815490 | 0,838488 | 1,208168 | 1,232443 | 1,210419 | 1,239457 | 1,194549 | 0,373540 | 0,416131 | 0,352291 |
| 0,935562 | 0,869231 | 0,827194 | 0,877011 | 0,877646 | 1,124276 | 1,163056 | 1,187599 | 1,120224 | 1,185573 | 1,706797 | 1,696707 | 1,680000 |

|              | Average AD | St. dev. AD | Average iNPH | St. dev. iNPH | Average CT | St. dev. CT |
|--------------|------------|-------------|--------------|---------------|------------|-------------|
| proteoform a | 0,910621   | 0,029796    | 1,232081     | 0,020612      | 3,22150    | 0,27716     |
| proteoform b | 0,853342   | 0,027090    | 1,302443     | 0,059869      | 1,22459    | 0,05922     |
| proteoform c | 0,826876   | 0,016510    | 1,217007     | 0,018495      | 0,38065    | 0,03251     |
| proteoform d | 0,877329   | 0,038634    | 1,156145     | 0,032439      | 1,69450    | 0,01353     |
