# Supplementary material for: Protein signature in cerebrospinal fluid and serum of Alzheimer’s disease patients: The case of apolipoprotein A-1 proteoforms
Source: PubMed Central journal article supplement (PMC5476270; doi:10.1371/journal.pone.0179280), 2017-06-19
Supplement: pone.0179280.s009.pdf [file pone.0179280.s009.pdf]

**S6 Table. 2-D DIGE volumes for Apo A-1 proteoforms in Serum.** Values represent the "standardised spot abundances" calculated by DeCyder software.

| Proteoform | Technical replicate | AD        |           |           |           |           | iNPH      |           |           |           |           | CT        |           |           |
|------------|---------------------|-----------|-----------|-----------|-----------|-----------|-----------|-----------|-----------|-----------|-----------|-----------|-----------|-----------|
|            |                     | subpool 1 | subpool 2 | subpool 3 | subpool 4 | subpool 5 | subpool 1 | subpool 2 | subpool 3 | subpool 4 | subpool 5 | subpool 1 | subpool 2 | subpool 3 |
| a          | 1                   | 1,041996  | 1,151453  | 1,134575  | 1,015879  | 1,172456  | 0,953696  | 0,980125  | 1,070024  | 1,154256  | 0,896262  | 1,011243  | 1,058766  | 1,180126  |
|            | 2                   | 1,058988  | 1,221608  | 0,974586  | 0,900756  | 1,301453  | 0,889453  | 0,866453  | 1,009807  | 1,030486  | 0,961457  | 1,066192  | 0,929845  | 1,053452  |
|            | 3                   | 1,144862  | 1,284265  | 1,053821  | 0,957288  | 1,239926  | 1,024533  | 0,924199  | 0,947124  | 1,092673  | 0,842843  | 1,134586  | 0,988456  | 1,118106  |
| b          | 1                   | 1,138465  | 1,274523  | 1,157194  | 1,248846  | 1,051246  | 0,940468  | 0,972798  | 0,913361  | 0,952865  | 0,930622  | 1,050835  | 1,043802  | 1,061088  |
|            | 2                   | 1,079072  | 1,138453  | 1,227456  | 1,182098  | 1,182456  | 1,000549  | 1,036453  | 0,975126  | 0,890453  | 0,993452  | 0,989922  | 1,104812  | 0,998453  |
|            | 3                   | 1,049146  | 1,190213  | 1,097453  | 1,118753  | 1,125761  | 0,880045  | 0,910457  | 0,847653  | 1,012446  | 0,871824  | 1,114596  | 0,969803  | 1,125466  |
| c          | 1                   | 0,974257  | 1,158393  | 1,152781  | 1,169453  | 1,099038  | 0,826338  | 0,885421  | 0,804236  | 0,769843  | 0,810011  | 1,054695  | 1,101453  | 1,039846  |
|            | 2                   | 1,100787  | 1,228456  | 1,200144  | 1,031453  | 1,018453  | 0,884528  | 0,819695  | 0,860144  | 0,885453  | 0,746255  | 0,921447  | 0,995486  | 1,114541  |
|            | 3                   | 1,032856  | 1,089845  | 1,101453  | 1,100591  | 1,151243  | 0,768453  | 0,757864  | 0,748566  | 0,826345  | 0,874543  | 0,99229   | 1,051478  | 0,971581  |
| d          | 1                   | 1,021488  | 1,222747  | 1,178453  | 1,180185  | 1,271453  | 0,982433  | 0,950751  | 0,975435  | 1,045455  | 0,955736  | 0,944672  | 1,128846  | 1,010456  |
|            | 2                   | 1,172481  | 1,305426  | 1,310456  | 1,249843  | 1,215531  | 0,866459  | 1,015426  | 0,915363  | 0,915469  | 0,891312  | 0,872454  | 0,999053  | 1,120453  |
|            | 3                   | 1,131798  | 1,165426  | 1,248012  | 1,111456  | 1,142489  | 0,925293  | 0,885429  | 0,857612  | 0,982211  | 0,825476  | 0,995469  | 1,061736  | 1,065411  |
| e          | 1                   | 0,864113  | 0,975734  | 1,021459  | 0,928453  | 0,915813  | 0,936154  | 1,201455  | 1,145783  | 1,256541  | 0,949266  | 0,986118  | 0,851841  | 0,994318  |
|            | 2                   | 0,939115  | 0,897435  | 0,962239  | 0,965974  | 0,974563  | 0,998476  | 1,311476  | 1,269452  | 1,320451  | 0,884525  | 0,912488  | 0,791442  | 1,054765  |
|            | 3                   | 1,012311  | 1,051453  | 0,895426  | 1,084256  | 0,839453  | 0,872498  | 1,259173  | 1,208161  | 1,189422  | 1,012455  | 1,035496  | 0,912453  | 0,929453  |

average volume proteoform a  
 average volume proteoform b  
 average volume proteoform c  
 average volume proteoform d  
 average volume proteoform e

|          |          |          |          |          |          |          |          |          |          |          |          |          |
|----------|----------|----------|----------|----------|----------|----------|----------|----------|----------|----------|----------|----------|
| 1,081949 | 1,219109 | 1,054327 | 0,957974 | 1,237945 | 0,955894 | 0,923592 | 1,008985 | 1,092472 | 0,900187 | 1,070674 | 0,992356 | 1,117228 |
| 1,088894 | 1,201063 | 1,160701 | 1,183232 | 1,119821 | 0,940354 | 0,973236 | 0,912047 | 0,951921 | 0,931966 | 1,051784 | 1,039472 | 1,061669 |
| 1,035967 | 1,158898 | 1,151459 | 1,100499 | 1,089578 | 0,826440 | 0,820993 | 0,804315 | 0,827214 | 0,810270 | 0,989477 | 1,049472 | 1,041989 |
| 1,108589 | 1,231200 | 1,245640 | 1,180495 | 1,209824 | 0,924728 | 0,950535 | 0,916137 | 0,981045 | 0,890841 | 0,937532 | 1,063212 | 1,065440 |
| 0,938513 | 0,974874 | 0,959708 | 0,992894 | 0,909943 | 0,935709 | 1,257368 | 1,207799 | 1,255471 | 0,948749 | 0,978034 | 0,851912 | 0,992845 |

|              | Average AD | St. dev. AD | Average iNPH | St. dev. iNPH | Average CT | St. dev. CT |
|--------------|------------|-------------|--------------|---------------|------------|-------------|
| proteoform a | 1,110261   | 0,117550    | 0,976226     | 0,076733      | 1,06009    | 0,06311     |
| proteoform b | 1,150742   | 0,046012    | 0,941905     | 0,022774      | 1,05098    | 0,01112     |
| proteoform c | 1,107280   | 0,050153    | 0,817846     | 0,010149      | 1,02698    | 0,03269     |
| proteoform d | 1,195150   | 0,054249    | 0,932657     | 0,034443      | 1,02206    | 0,07321     |
| proteoform e | 0,955186   | 0,032229    | 1,121019     | 0,164481      | 0,94093    | 0,07745     |
