# Supplementary material for: Protein signature in cerebrospinal fluid and serum of Alzheimer’s disease patients: The case of apolipoprotein A-1 proteoforms
Source: PLoS One. 2017 Jun 19;12(6):e0179280. doi: 10.1371/journal.pone.0179280 (PMC5476270; doi:10.1371/journal.pone.0179280)
Supplement: S7 Table — Together with proteoform name, the GI, therotichal pI and MW, method of analysis, sequence coverage, number of identified peptides and information about MS/MS analysis (where needed) are reported. In proapo proteoforms the N-terminal peptide characteristic of apo proteoforms (DEPPQSPWDR) is absent. (PDF) [file pone.0179280.s010.pdf]

**S7 Table. Mass spectrometry identification data for apo A-1 and proapo A-1 proteoforms.** Together with proteoform name, the GI, therotichal pI and MW, method of analysis, sequence coverage, number of identified peptides and information about MS/MS analysis (where needed) are reported. In proapo proteoforms the N-terminal peptide characteristic of apo proteoforms (DEPPQSPWDR) is absent.

| Proteoform | Name                  | GI       | Theroetichal MW [kDa] | Theorethical pI | Method     | MASCOT score | Sequence Coverage (%) | Matched/ searched peptides | MS/MS                | MS/MS Score | m/z      | z |
|------------|-----------------------|----------|-----------------------|-----------------|------------|--------------|-----------------------|----------------------------|----------------------|-------------|----------|---|
| a          | Apolipoprotein A-1    | 90108664 | 28.1                  | 5.1             | PMF+ MS/MS | 102          | 47                    | 10/19                      | <b>1DEPPQSPWDR10</b> | 55          | 1226.544 | 1 |
| b          |                       |          |                       |                 |            | 205          | 49                    | 14/23                      |                      | 56          | 1226.538 | 1 |
| c          |                       |          |                       |                 |            | 276          | 71                    | 22/38                      |                      | 72          | 1226.544 | 1 |
| d          | Proapolipoprotein A-1 | 253362   | 28.9                  | 5.45            | PMF        | 172          | 65                    | 21/38                      | <b>absent</b>        |             |          |   |
| e          |                       |          |                       |                 |            | 175          | 36                    | 11/16                      |                      |             |          |   |
